# Supplementary material for: Self-referencing rates in biological disciplines
Source: Front Res Metr Anal. 2023 Sep 22;8:1215401. doi: 10.3389/frma.2023.1215401 (PMC10556682; doi:10.3389/frma.2023.1215401)
Supplement: Supplementary Table S2 — Comparison of automated vs. manually calculated self-referencing estimates. A total of 100 publications were randomly selected from all publications analyzed in this study. Columns are identical to those in Supplementary Table S1, with the addition of three new columns containing manually calculated values for the number of self-references, the total number of references in each publication, and the percentage of self-references. [file Table_2.XLSX]

## Sheet: TableS2
Journal	Pubmed ID	All Authors (original order)	All Authors Number of Self-References	All Authors Percentage Self-References	Highest Self-Referencing Author	Number of Self-References (max. author)	Total Number of References	Percentage Self-References (max. author)	Manually Verified Number of Self-References (max. author)	Manually Verified Total Number of References	Manually Verified Percentage Self-References (max. author)
mBio	29895636	Dylan W White;Sarah R Elliott;Evan Odean;Lynne T Bemis;Anna D Tischler	1;2;0;0;6	2.5;5.0;0.0;0.0;15.0	Anna D Tischler	6	40	15	6	40	15
PlosPath	24968198	Eugene V Ryabov;Graham R Wood;Jessica M Fannon;Jonathan D Moore;James C Bull;Dave Chandler;Andrew Mead;Nigel Burroughs;David J Evans	3;1;1;1;1;1;1;2;2	4.11;1.37;1.37;1.37;1.37;1.37;1.37;2.74;2.74	Eugene V Ryabov	3	73	4.11	3	86	3.48837
PlosGenet	29668692	Daniel Dar;Rotem Sorek	3;5	6.52;10.87	Rotem Sorek	5	46	10.87	5	51	9.80392
PlosPath	23055932	Maryam Kamali;Ai Xia;Zhijian Tu;Igor V Sharakhov	0;3;1;5	0.0;7.14;2.38;11.9	Igor V Sharakhov	5	42	11.9	5	47	10.6383
BMCmed	30961604	Vladeta Ajdacic-Gross;Margot Mutsch;Stephanie Rodgers;Anja Tesic;Mario Müller;Erich Seifritz;En-Young N Wagner;Roland von Känel;Markus A Landolt;Nina Steinemann;Viktor von Wyl;Enrique Castelao;Marie-Pierre F Strippoli;Jennifer Glaus;Caroline Vandeleur;Pedro M Marques-Vidal;Peter Vollenweider;Martin Preisig	4;1;4;0;4;0;0;2;0;0;0;4;0;0;3;0;3;9	6.15;1.54;6.15;0.0;6.15;0.0;0.0;3.08;0.0;0.0;0.0;6.15;0.0;0.0;4.62;0.0;4.62;13.85	Martin Preisig	9	65	13.85	9	71	12.6761
PlosPath	33108395	Xin Wang;Zhuanchang Wu;Yuming Li;Yifan Yang;Changguang Xiao;Xiqian Liu;Xiao Xiang;Jianchao Wei;Donghua Shao;Ke Liu;Xufang Deng;Jiaqiang Wu;Yafeng Qiu;Beibei Li;Zhiyong Ma	1;1;0;2;0;0;0;5;5;3;3;0;4;4;6	1.47;1.47;0.0;2.94;0.0;0.0;0.0;7.35;7.35;4.41;4.41;0.0;5.88;5.88;8.82	Zhiyong Ma	6	68	8.82	7	68	10.2941
JCellBiol	27646276	Ravikiran Kasula;Ye Jin Chai;Adekunle T Bademosi;Callista B Harper;Rachel S Gormal;Isabel C Morrow;Eric Hosy;Brett M Collins;Daniel Choquet;Andreas Papadopulos;Frédéric A Meunier	1;0;0;1;2;0;3;5;6;4;0	2.22;0.0;0.0;2.22;4.44;0.0;6.67;11.11;13.33;8.89;0.0	Daniel Choquet	6	45	13.33	6	45	13.3333
BMCmed	25948112	Dora Romaguera;Heather Ward;Petra A Wark;Anne-Claire Vergnaud;Petra H Peeters;Carla H van Gils;Pietro Ferrari;Veronika Fedirko;Mazda Jenab;Marie-Christine Boutron-Ruault;Laure Dossus;Laureen Dartois;Camilla Plambeck Hansen;Christina Catherine Dahm;Genevieve Buckland;María José Sánchez;Miren Dorronsoro;Carmen Navarro;Aurelio Barricarte;Timothy J Key;Antonia Trichopoulou;Christos Tsironis;Pagona La…	4;0;2;2;4;3;5;2;3;3;1;1;0;0;0;1;3;1;5;4;8;0;1;2;1;5;6;6;5;2;0;1;0;0;2;1;0;5;1;9;8;1;2;11;8	12.5;0.0;6.25;6.25;12.5;9.38;15.62;6.25;9.38;9.38;3.12;3.12;0.0;0.0;0.0;3.12;9.38;3.12;15.62;12.5;25.0;0.0;3.12;6.25;3.12;15.62;18.75;18.75;15.62;6.25;0.0;3.12;0.0;0.0;6.25;3.12;0.0;15.62;3.12;28.12;25.0;3.12;6.25;34.38;25.0	Elio Riboli	11	32	34.38	11	34	32.3529
PlosGenet	23818873	Shivani S Singh;David C Grainger	1;5	2.94;14.71	David C Grainger	5	34	14.71	5	35	14.2857
PlosPath	28837667	Margery G Smelkinson;Annabel Guichard;John R Teijaro;Meghana Malur;Maria Eugenia Loureiro;Prashant Jain;Sundar Ganesan;Elina I Zúñiga;Robert M Krug;Michael B Oldstone;Ethan Bier	1;1;0;0;0;0;1;0;2;0;5	1.61;1.61;0.0;0.0;0.0;0.0;1.61;0.0;3.23;0.0;8.06	Ethan Bier	5	62	8.06	5	63	7.93651
Genetics	19901071	Pamela E Hoppe;Johnnie Chau;Kelly A Flanagan;April R Reedy;Lawrence A Schriefer	2;0;0;0;1	4.65;0.0;0.0;0.0;2.33	Pamela E Hoppe	2	43	4.65	2	46	4.34783
Genetics	32586890	Simon W A Titen;Makenna T B Johnson;Mario Capecchi;Kent G Golic	3;0;0;11	5.08;0.0;0.0;18.64	Kent G Golic	11	59	18.64	11	59	18.6441
CurrBiol	28943083	Ravi D Nath;Claire N Bedbrook;Michael J Abrams;Ty Basinger;Justin S Bois;David A Prober;Paul W Sternberg;Viviana Gradinaru;Lea Goentoro	1;0;1;1;0;1;1;1;1	2.86;0.0;2.86;2.86;0.0;2.86;2.86;2.86;2.86	Ravi D Nath;Michael J Abrams;Ty Basinger;David A Prober;Paul W Sternberg;Viviana Gradinaru;Lea Goentoro	1	35	2.86	1	44	2.27273
PlosCompBiol	21060857	Timo Vuorela;Andrea Catte;Perttu S Niemelä;Anette Hall;Marja T Hyvönen;Siewert-Jan Marrink;Mikko Karttunen;Ilpo Vattulainen	1;2;2;1;3;2;1;8	1.32;2.63;2.63;1.32;3.95;2.63;1.32;10.53	Ilpo Vattulainen	8	76	10.53	8	79	10.1266
mBio	34724818	Liam D McDonough;Animesh A Mishra;Nicholas Tosini;Pallavi Kakade;Swathi Penumutchu;Shen-Huan Liang;Corrine Maufrais;Bing Zhai;Ying Taur;Peter Belenky;Richard J Bennett;Tobias M Hohl;Andrew Y Koh;Iuliana V Ene	0;0;0;1;0;1;0;1;1;0;6;2;4;3	0.0;0.0;0.0;1.11;0.0;1.11;0.0;1.11;1.11;0.0;6.67;2.22;4.44;3.33	Richard J Bennett	6	90	6.67	6	94	6.38298
PlosCompBiol	29522509	Sarah Jarvis;Konstantin Nikolic;Simon R Schultz	2;5;2	3.7;9.26;3.7	Konstantin Nikolic	5	54	9.26	5	57	8.77193
JCellBiol	20974812	Masaru Mitsushima;Kazuhiro Aoki;Miki Ebisuya;Shigeru Matsumura;Takuya Yamamoto;Michiyuki Matsuda;Fumiko Toyoshima;Eisuke Nishida	0;0;0;0;0;0;1;1	0.0;0.0;0.0;0.0;0.0;0.0;3.03;3.03	Fumiko Toyoshima;Eisuke Nishida	1	33	3.03	1	33	3.0303
MCB	14612391	Jennifer A Hackett;Carol W Greider	3;10	4.11;13.7	Carol W Greider	10	73	13.7	10	75	13.3333
PlosPath	22291589	Henk J Busscher;Henny C van der Mei	7;7	33.33;33.33	Henk J Busscher;Henny C van der Mei	7	21	33.33	8	24	33.3333
Genetics	23770700	Roy Ronen;Nitin Udpa;Eran Halperin;Vineet Bafna	0;2;0;2	0.0;4.88;0.0;4.88	Nitin Udpa;Vineet Bafna	2	41	4.88	2	51	3.92157
Genetics	16702422	Denis Roze;Nick H Barton	0;7	0.0;18.42	Nick H Barton	7	38	18.42	8	54	14.8148
PlosGenet	28046117	Yuan O Zhu;Gavin Sherlock;Dmitri A Petrov	2;2;4	3.45;3.45;6.9	Dmitri A Petrov	4	58	6.9	4	64	6.25
PlosCompBiol	20628618	Tetsuya Shiraishi;Shinako Matsuyama;Hiroaki Kitano	0;0;0	0.0;0.0;0.0	Tetsuya Shiraishi;Shinako Matsuyama;Hiroaki Kitano	0	67	0	0	70	0
Science	27365313	Christoph T Ellebrecht;Vijay G Bhoj;Arben Nace;Eun Jung Choi;Xuming Mao;Michael Jeffrey Cho;Giovanni Di Zenzo;Antonio Lanzavecchia;John T Seykora;George Cotsarelis;Michael C Milone;Aimee S Payne	1;0;0;0;1;1;1;1;0;0;0;3	2.86;0.0;0.0;0.0;2.86;2.86;2.86;2.86;0.0;0.0;0.0;8.57	Aimee S Payne	3	35	8.57	4	37	10.8108
Nature	30568302	Yong Chen;Kenji Ikeda;Takeshi Yoneshiro;Annarita Scaramozza;Kazuki Tajima;Qiang Wang;Kyeongkyu Kim;Kosaku Shinoda;Carlos Henrique Sponton;Zachary Brown;Andrew Brack;Shingo Kajimura	2;2;2;0;1;0;0;6;0;0;0;10	5.26;5.26;5.26;0.0;2.63;0.0;0.0;15.79;0.0;0.0;0.0;26.32	Shingo Kajimura	10	38	26.32	10	38	26.3158
PlosPath	31449551	Jay Vornhagen;Yuang Sun;Paul Breen;Valerie Forsyth;Lili Zhao;Harry L T Mobley;Michael A Bachman	0;0;2;0;3;4;12	0.0;0.0;2.56;0.0;3.85;5.13;15.38	Michael A Bachman	12	78	15.38	12	84	14.2857
BMCmed	14736342	Alexandra Papaioannou;William Parkinson;Richard Cook;Nicole Ferko;Esther Coker;Jonathan D Adachi	0;0;0;0;1;0	0.0;0.0;0.0;0.0;4.76;0.0	Esther Coker	1	21	4.76	1	25	4
PlosCompBiol	26745628	Marco A Deriu;Gianvito Grasso;Jack A Tuszynski;Diego Gallo;Umberto Morbiducci;Andrea Danani	3;1;1;1;3;2	5.08;1.69;1.69;1.69;5.08;3.39	Marco A Deriu;Umberto Morbiducci	3	59	5.08	3	69	4.34783
mBio	29114026	Kevin W Graepel;Xiaotao Lu;James Brett Case;Nicole R Sexton;Everett Clinton Smith;Mark R Denison	0;2;1;2;4;11	0.0;2.33;1.16;2.33;4.65;12.79	Mark R Denison	11	86	12.79	11	88	12.5
PlosPath	22479185	Shuzhen Sim;José L Ramirez;George Dimopoulos	2;0;8	2.6;0.0;10.39	George Dimopoulos	8	77	10.39	8	80	10
PlosMed	33373361	Christelle Elia;Alexis Karamanos;Alexandru Dregan;Majella O'Keeffe;Ingrid Wolfe;Jane Sandall;Craig Morgan;J Kennedy Cruickshank;Reeta Gobin;Rainford Wilks;Seeromanie Harding	0;0;0;0;0;0;0;0;0;0;0	0.0;0.0;0.0;0.0;0.0;0.0;0.0;0.0;0.0;0.0;0.0	Christelle Elia;Alexis Karamanos;Alexandru Dregan;Majella O'Keeffe;Ingrid Wolfe;Jane Sandall;Craig Morgan;J Kennedy Cruickshank;Reeta Gobin;Rainford Wilks;Seeromanie Harding	0	34	0	0	44	0
MCB	17967894	Xiaohui Liu;Marina Vorontchikhina;Yuan-Liang Wang;Francesco Faiola;Ernest Martinez	2;0;0;1;6	2.3;0.0;0.0;1.15;6.9	Ernest Martinez	6	87	6.9	6	87	6.89655
MCB	14673150	Leon O Murphy;Jeffrey P MacKeigan;John Blenis	1;0;4	2.33;0.0;9.3	John Blenis	4	43	9.3	4	43	9.30233
PlosPath	34460865	Eita Sasaki;Hideki Asanuma;Haruka Momose;Keiko Furuhata;Takuo Mizukami;Isao Hamaguchi	0;2;0;0;0;0	0.0;3.7;0.0;0.0;0.0;0.0	Hideki Asanuma	2	54	3.7	2	56	3.57143
Nature	26352477	Jakub Rajniak;Brenden Barco;Nicole K Clay;Elizabeth S Sattely	0;0;2;0	0.0;0.0;7.41;0.0	Nicole K Clay	2	27	7.41	2	28	7.14286
PlosPath	28542486	Anuradha Chowdhary;Cheshta Sharma;Jacques F Meis	10;6;11	40.0;24.0;44.0	Jacques F Meis	11	25	44	11	30	36.6667
mBio	28811344	Krishna Kurthkoti;Hamel Amin;Mohlopheni J Marakalala;Saleena Ghanny;Selvakumar Subbian;Alexandra Sakatos;Jonathan Livny;Sarah M Fortune;Michael Berney;G Marcela Rodriguez	0;0;1;2;1;0;2;0;2;7	0.0;0.0;1.27;2.53;1.27;0.0;2.53;0.0;2.53;8.86	G Marcela Rodriguez	7	79	8.86	7	86	8.13953
mBio	32398311	Jeffrey M Rybak;José F Muñoz;Katherine S Barker;Josie E Parker;Brooke D Esquivel;Elizabeth L Berkow;Shawn R Lockhart;Lalitha Gade;Glen E Palmer;Theodore C White;Steve L Kelly;Christina A Cuomo;P David Rogers	3;3;5;4;0;6;5;3;2;2;2;4;9	7.89;7.89;13.16;10.53;0.0;15.79;13.16;7.89;5.26;5.26;5.26;10.53;23.68	P David Rogers	9	38	23.68	9	42	21.4286
PlosCompBiol	21390282	Chikako Ragan;Michael Zuker;Mark A Ragan	1;4;1	2.5;10.0;2.5	Michael Zuker	4	40	10	4	40	10
Genetics	20551433	Rosaria Rendina;Agostino Strangi;Bice Avallone;Ennio Giordano	1;0;0;2	1.56;0.0;0.0;3.12	Ennio Giordano	2	64	3.12	2	65	3.07692
JCellBiol	21422227	Juan A Bernal;Ashok R Venkitaraman	1;1	3.23;3.23	Juan A Bernal;Ashok R Venkitaraman	1	31	3.23	1	31	3.22581
PlosPath	33508040	Simon Marlaire;Christoph Dehio	0;22	0.0;53.66	Christoph Dehio	22	41	53.66	22	42	52.381
PlosMed	15971936	Nathan Weisz;Stephan Moratti;Marcus Meinzer;Katalin Dohrmann;Thomas Elbert	1;1;2;0;6	2.22;2.22;4.44;0.0;13.33	Thomas Elbert	6	45	13.33	9	54	16.6667
PlosGenet	24009522	Aaron M Wenger;Shoa L Clarke;James H Notwell;Tisha Chung;Geetu Tuteja;Harendra Guturu;Bruce T Schaar;Gill Bejerano	3;3;0;0;0;1;3;6	4.92;4.92;0.0;0.0;0.0;1.64;4.92;9.84	Gill Bejerano	6	61	9.84	6	65	9.23077
mBio	35536006	Andrew Oliver;Zhengyao Xue;Yirui T Villanueva;Blythe Durbin-Johnson;Zeynep Alkan;Diana H Taft;Jinxin Liu;Ian Korf;Kevin D Laugero;Charles B Stephensen;David A Mills;Mary E Kable;Danielle G Lemay	1;0;0;0;0;3;2;1;4;6;3;1;6	1.45;0.0;0.0;0.0;0.0;4.35;2.9;1.45;5.8;8.7;4.35;1.45;8.7	Charles B Stephensen;Danielle G Lemay	6	69	8.7	6	93	6.45161
PlosGenet	31356597	Adam J Dobson;Richard Boulton-McDonald;Lara Houchou;Tatiana Svermova;Ziyu Ren;Jeremie Subrini;Mireya Vazquez-Prada;Mimoza Hoti;Maria Rodriguez-Lopez;Rita Ibrahim;Afroditi Gregoriou;Alexis Gkantiragas;Jürg Bähler;Marina Ezcurra;Nazif Alic	2;0;0;0;0;0;0;0;0;0;0;0;0;0;4	4.44;0.0;0.0;0.0;0.0;0.0;0.0;0.0;0.0;0.0;0.0;0.0;0.0;0.0;8.89	Nazif Alic	4	45	8.89	4	45	8.88889
PlosGenet	29529025	Damla Tas;Luca Stickley;Federico Miozzo;Rafael Koch;Nicolas Loncle;Virginie Sabado;Bettina Gnägi;Emi Nagoshi	1;0;0;0;0;1;1;2	1.52;0.0;0.0;0.0;0.0;1.52;1.52;3.03	Emi Nagoshi	2	66	3.03	2	70	2.85714
Genetics	16582449	Marie Veron;Yanfei Zou;Qun Yu;Xin Bi;Abdelkader Selmi;Eric Gilson;Pierre-Antoine Defossez	0;1;1;1;0;3;1	0.0;3.45;3.45;3.45;0.0;10.34;3.45	Eric Gilson	3	29	10.34	3	29	10.3448
PlosPath	25329993	Khalid Amari;Martin Di Donato;Valerian V Dolja;Manfred Heinlein	3;0;10;9	4.69;0.0;15.62;14.06	Valerian V Dolja	10	64	15.62	10	64	15.625
PlosGenet	36137003	Margaret C Steiner;John Novembre	0;3	0.0;2.94	John Novembre	3	102	2.94	4	133	3.00752
Nature	29950719	John J Seeley;Rebecca G Baker;Ghait Mohamed;Tony Bruns;Matthew S Hayden;Sachin D Deshmukh;Daniel E Freedberg;Sankar Ghosh	0;0;0;0;0;0;0;1	0.0;0.0;0.0;0.0;0.0;0.0;0.0;2.63	Sankar Ghosh	1	38	2.63	1	42	2.38095
CurrBiol	20674359	Marina Elez;Andrew W Murray;Li-Jun Bi;Xian-En Zhang;Ivan Matic;Miroslav Radman	0;0;0;0;0;2	0.0;0.0;0.0;0.0;0.0;8.33	Miroslav Radman	2	24	8.33	2	24	8.33333
PlosPath	34352042	Shaohui Wang;Ujjaldeep Jaggi;Jack Yu;Homayon Ghiasi	5;1;0;23	7.81;1.56;0.0;35.94	Homayon Ghiasi	23	64	35.94	23	65	35.3846
MCB	12509456	Tiho Miralem;Hava Karsenty Avraham	2;1	2.47;1.23	Tiho Miralem	2	81	2.47	2	81	2.46914
PlosGenet	25356737	Jin-Gyoung Jung;Alexander Stoeck;Bin Guan;Ren-Chin Wu;Heng Zhu;Seth Blackshaw;Ie-Ming Shih;Tian-Li Wang	0;1;0;0;2;1;3;3	0.0;4.76;0.0;0.0;9.52;4.76;14.29;14.29	Ie-Ming Shih;Tian-Li Wang	3	21	14.29	3	22	13.6364
Nature	25754329	Christina Twyman-Saint Victor;Andrew J Rech;Amit Maity;Ramesh Rengan;Kristen E Pauken;Erietta Stelekati;Joseph L Benci;Bihui Xu;Hannah Dada;Pamela M Odorizzi;Ramin S Herati;Kathleen D Mansfield;Dana Patsch;Ravi K Amaravadi;Lynn M Schuchter;Hemant Ishwaran;Rosemarie Mick;Daniel A Pryma;Xiaowei Xu;Michael D Feldman;Tara C Gangadhar;Stephen M Hahn;E John Wherry;Robert H Vonderheide;Andy J Minn	0;0;0;0;0;0;0;0;0;1;0;0;0;0;0;1;0;0;0;0;1;0;2;1;0	0.0;0.0;0.0;0.0;0.0;0.0;0.0;0.0;0.0;3.57;0.0;0.0;0.0;0.0;0.0;3.57;0.0;0.0;0.0;0.0;3.57;0.0;7.14;3.57;0.0	E John Wherry	2	28	7.14	2	33	6.06061
PlosCompBiol	33577583	Jordane Preto;Isabelle Krimm	1;0	2.04;0.0	Jordane Preto	1	49	2.04	1	52	1.92308
PlosPath	32866188	Binghua Chen;Lin Lin;Yuwen Lu;Jiejun Peng;Hongying Zheng;Qiankun Yang;Shaofei Rao;Guanwei Wu;Junmin Li;Zhuo Chen;Baoan Song;Jianping Chen;Fei Yan	0;3;3;2;3;0;0;0;1;1;1;4;5	0.0;4.76;4.76;3.17;4.76;0.0;0.0;0.0;1.59;1.59;1.59;6.35;7.94	Fei Yan	5	63	7.94	5	63	7.93651
Cell	32937106	Xiong Xiao;Hanfei Deng;Alessandro Furlan;Tao Yang;Xian Zhang;Ga-Ram Hwang;Jason Tucciarone;Priscilla Wu;Miao He;Ramesh Palaniswamy;Charu Ramakrishnan;Kimberly Ritola;Adam Hantman;Karl Deisseroth;Pavel Osten;Z Josh Huang;Bo Li	0;0;1;0;1;0;2;3;4;0;1;0;0;3;2;4;3	0.0;0.0;1.28;0.0;1.28;0.0;2.56;3.85;5.13;0.0;1.28;0.0;0.0;3.85;2.56;5.13;3.85	Miao He;Z Josh Huang	4	78	5.13	4	80	5
PlosCompBiol	27851764	Adam F Prasanphanich;Douglas E White;Margaret A Gran;Melissa L Kemp	1;0;0;1	1.22;0.0;0.0;1.22	Adam F Prasanphanich;Melissa L Kemp	1	82	1.22	1	90	1.11111
JCellBiol	21646403	Robin M Ricke;Karthik B Jeganathan;Jan M van Deursen	1;6;11	1.14;6.82;12.5	Jan M van Deursen	11	88	12.5	11	88	12.5
Bioinformatics	29028963	Zeljko Tomljanovic;Mitesh Patel;William Shin;Andrea Califano;Andrew F Teich	0;0;1;5;1	0.0;0.0;3.85;19.23;3.85	Andrea Califano	5	26	19.23	5	26	19.2308
Cell	29149603	Hauke S Hillen;Yaroslav I Morozov;Azadeh Sarfallah;Dmitry Temiakov;Patrick Cramer	1;7;0;10;6	1.92;13.46;0.0;19.23;11.54	Dmitry Temiakov	10	52	19.23	10	52	19.2308
Genetics	22701050	Romain Koszul;Matthew Meselson;Karine Van Doninck;Jean Vandenhaute;Denise Zickler	0;1;0;0;3	0.0;3.7;0.0;0.0;11.11	Denise Zickler	3	27	11.11	4	63	6.34921
MCB	12482976	Eulàlia de Nadal;Laura Casadomé;Francesc Posas	2;0;4	8.33;0.0;16.67	Francesc Posas	4	24	16.67	4	24	16.6667
MCB	15572667	Kazuhiko Nishida;Osamu Yamaguchi;Shinichi Hirotani;Shungo Hikoso;Yoshiharu Higuchi;Tetsuya Watanabe;Toshihiro Takeda;Soh Osuka;Takashi Morita;Gen Kondoh;Yoshihiro Uno;Kazunori Kashiwase;Masayuki Taniike;Atsuko Nakai;Yasushi Matsumura;Jun-ichi Miyazaki;Tatsuhiko Sudo;Kenichi Hongo;Yoichiro Kusakari;Satoshi Kurihara;Kenneth R Chien;Junji Takeda;Masatsugu Hori;Kinya Otsu	4;4;3;3;3;2;3;0;1;0;0;2;1;0;4;0;2;2;2;2;6;0;4;4	10.53;10.53;7.89;7.89;7.89;5.26;7.89;0.0;2.63;0.0;0.0;5.26;2.63;0.0;10.53;0.0;5.26;5.26;5.26;5.26;15.79;0.0;10.53;10.53	Kenneth R Chien	6	38	15.79	6	38	15.7895
PlosCompBiol	36206310	Laura Fontanesi;Amitai Shenhav;Sebastian Gluth	0;7;4	0.0;25.0;14.29	Amitai Shenhav	7	28	25	8	36	22.2222
Cell	27610569	Amelia Escolano;Jon M Steichen;Pia Dosenovic;Daniel W Kulp;Jovana Golijanin;Devin Sok;Natalia T Freund;Alexander D Gitlin;Thiago Oliveira;Tatsuya Araki;Sarina Lowe;Spencer T Chen;Jennifer Heinemann;Kai-Hui Yao;Erik Georgeson;Karen L Saye-Francisco;Anna Gazumyan;Yumiko Adachi;Michael Kubitz;Dennis R Burton;William R Schief;Michel C Nussenzweig	1;0;2;4;1;8;1;1;2;0;0;0;0;1;1;1;3;2;1;19;8;18	1.39;0.0;2.78;5.56;1.39;11.11;1.39;1.39;2.78;0.0;0.0;0.0;0.0;1.39;1.39;1.39;4.17;2.78;1.39;26.39;11.11;25.0	Dennis R Burton	19	72	26.39	23	81	28.3951
JCellBiol	16702235	Stefanie Weinert;Nora Bergmann;Xiuju Luo;Bettina Erdmann;Michael Gotthardt	0;0;0;0;3	0.0;0.0;0.0;0.0;5.36	Michael Gotthardt	3	56	5.36	3	56	5.35714
JCellBiol	26929450	Galo Garcia;Gregory C Finnigan;Lydia R Heasley;Sarah M Sterling;Adeeti Aggarwal;Chad G Pearson;Eva Nogales;Michael A McMurray;Jeremy Thorner	4;2;1;0;0;0;4;9;15	4.71;2.35;1.18;0.0;0.0;0.0;4.71;10.59;17.65	Jeremy Thorner	15	85	17.65	15	90	16.6667
JCellBiol	16365160	Ikuo Nakamichi;Diana M Toivola;Pavel Strnad;Sara A Michie;Robert G Oshima;Hélène Baribault;M Bishr Omary	1;5;0;1;2;1;13	2.63;13.16;0.0;2.63;5.26;2.63;34.21	M Bishr Omary	13	38	34.21	13	38	34.2105
Nature	25945738	Seung-Yeol Park;Jia-Shu Yang;Angela B Schmider;Roy J Soberman;Victor W Hsu	0;6;1;2;7	0.0;25.0;4.17;8.33;29.17	Victor W Hsu	7	24	29.17	7	24	29.1667
mBio	34006648	Transito Garcia-Garcia;Sandrine Poncet;Elodie Cuenot;Thibaut Douché;Quentin Giai Gianetto;Johann Peltier;Pascal Courtin;Marie-Pierre Chapot-Chartier;Mariette Matondo;Bruno Dupuy;Thomas Candela;Isabelle Martin-Verstraete	1;0;1;0;0;3;5;5;1;4;2;3	1.3;0.0;1.3;0.0;0.0;3.9;6.49;6.49;1.3;5.19;2.6;3.9	Pascal Courtin;Marie-Pierre Chapot-Chartier	5	77	6.49	5	81	6.17284
PlosGenet	35857772	Christophe Lambing;Pallas Kuo;Jaeil Kim;Kim Osman;Amy Leanne Whitbread;Jianhua Yang;Kyuha Choi;F Chris H Franklin;Ian R Henderson	10;2;2;6;0;3;4;8;7	11.9;2.38;2.38;7.14;0.0;3.57;4.76;9.52;8.33	Christophe Lambing	10	84	11.9	10	85	11.7647
PlosBiol	29702638	Michael Famulare;Christian Selinger;Kevin A McCarthy;Philip A Eckhoff;Guillaume Chabot-Couture	5;0;2;0;2	4.9;0.0;1.96;0.0;1.96	Michael Famulare	5	102	4.9	5	131	3.81679
Genetics	12586705	Manuel J Muñoz;Donald L Riddle	1;9	1.64;14.75	Donald L Riddle	9	61	14.75	10	65	15.3846
PlosCompBiol	22719243	Romain Brette	9	11.25	Romain Brette	9	80	11.25	9	91	9.89011
Bioinformatics	31510705	Muhao Chen;Chelsea J-T Ju;Guangyu Zhou;Xuelu Chen;Tianran Zhang;Kai-Wei Chang;Carlo Zaniolo;Wei Wang	0;0;0;0;0;0;0;0	0.0;0.0;0.0;0.0;0.0;0.0;0.0;0.0	Muhao Chen;Chelsea J-T Ju;Guangyu Zhou;Xuelu Chen;Tianran Zhang;Kai-Wei Chang;Carlo Zaniolo;Wei Wang	0	38	0	1	67	1.49254
MCB	14585965	Jacqueline Arp;Mark G Kirchhof;Miren L Baroja;Steven H Nazarian;Thu A Chau;Craig A Strathdee;Eric H Ball;Joaquín Madrenas	0;0;2;0;2;1;1;4	0.0;0.0;3.57;0.0;3.57;1.79;1.79;7.14	Joaquín Madrenas	4	56	7.14	4	57	7.01754
PlosPath	27415008	Rémi Fromentin;Wendy Bakeman;Mariam B Lawani;Gabriela Khoury;Wendy Hartogensis;Sandrina DaFonseca;Marisela Killian;Lorrie Epling;Rebecca Hoh;Elizabeth Sinclair;Frederick M Hecht;Peter Bacchetti;Steven G Deeks;Sharon R Lewin;Rafick-Pierre Sékaly;Nicolas Chomont	3;1;1;1;1;1;0;1;4;4;5;3;8;3;4;7	5.66;1.89;1.89;1.89;1.89;1.89;0.0;1.89;7.55;7.55;9.43;5.66;15.09;5.66;7.55;13.21	Steven G Deeks	8	53	15.09	9	54	16.6667
Nature	30051891	Nahid Iglesias;Mark A Currie;Gloria Jih;Joao A Paulo;Nertila Siuti;Marian Kalocsay;Steven P Gygi;Danesh Moazed	2;1;2;3;0;0;7;4	4.76;2.38;4.76;7.14;0.0;0.0;16.67;9.52	Steven P Gygi	7	42	16.67	7	43	16.2791
PlosBiol	33017389	Yanzhu Li;Huan Luo;Xing Tian	0;3;14	0.0;3.75;17.5	Xing Tian	14	80	17.5	16	86	18.6047
Genetics	19139146	Liqin Cao;Brian S Ort;Athanasia Mizi;Grant Pogson;Elen Kenchington;Eleftherios Zouros;George C Rodakis	1;1;2;0;0;12;6	2.56;2.56;5.13;0.0;0.0;30.77;15.38	Eleftherios Zouros	12	39	30.77	13	46	28.2609
PlosBiol	31107867	Yunyun Wang;Sheng Liu;Lu Sun;Ning Xu;Shan Shan;Fei Wu;Xiaoping Liang;Yingzi Huang;Ed Luk;Carl Wu;Zheng Zhou	0;0;1;0;2;0;2;3;4;7;3	0.0;0.0;3.57;0.0;7.14;0.0;7.14;10.71;14.29;25.0;10.71	Carl Wu	7	28	25	7	30	23.3333
Nature	19169242	Chen Zhao;Alan Chen;Catriona H Jamieson;Mark Fereshteh;Annelie Abrahamsson;Jordan Blum;Hyog Young Kwon;Jynho Kim;John P Chute;David Rizzieri;Michael Munchhof;Todd VanArsdale;Philip A Beachy;Tannishtha Reya	2;1;0;0;0;2;2;1;0;0;0;0;4;3	7.14;3.57;0.0;0.0;0.0;7.14;7.14;3.57;0.0;0.0;0.0;0.0;14.29;10.71	Philip A Beachy	4	28	14.29	4	30	13.3333
Genetics	24037265	Suman Yadav;Madhu G Tapadia	0;1	0.0;1.67	Madhu G Tapadia	1	60	1.67	1	60	1.66667
PlosCompBiol	16683020	Karen Lipkow	1	1.64	Karen Lipkow	1	61	1.64	1	62	1.6129
PlosGenet	23754963	Haiqing Fu;Alika K Maunakea;Melvenia M Martin;Liang Huang;Ya Zhang;Michael Ryan;RyangGuk Kim;Chii Meil Lin;Keji Zhao;Mirit I Aladjem	4;0;2;1;1;1;1;0;0;10	7.84;0.0;3.92;1.96;1.96;1.96;1.96;0.0;0.0;19.61	Mirit I Aladjem	10	51	19.61	10	51	19.6078
mBio	31266871	Brittany A Niccum;Heewook Lee;Wazim MohammedIsmail;Haixu Tang;Patricia L Foster	2;5;2;5;5	3.64;9.09;3.64;9.09;9.09	Heewook Lee;Haixu Tang;Patricia L Foster	5	55	9.09	5	58	8.62069
PlosCompBiol	30481168	Lina Meinecke;Praveer P Sharma;Huijing Du;Lei Zhang;Qing Nie;Thomas F Schilling	0;0;0;0;2;8	0.0;0.0;0.0;0.0;3.03;12.12	Thomas F Schilling	8	66	12.12	11	75	14.6667
mBio	21933919	Stewart T Chang;Pavel Sova;Xinxia Peng;Jeffrey Weiss;G Lynn Law;Robert E Palermo;Michael G Katze	0;0;1;0;0;0;5	0.0;0.0;2.17;0.0;0.0;0.0;10.87	Michael G Katze	5	46	10.87	5	49	10.2041
JCellBiol	17000882	Vladimir Sytnyk;Iryna Leshchyns'ka;Alexander G Nikonenko;Melitta Schachner	6;5;1;14	12.5;10.42;2.08;29.17	Melitta Schachner	14	48	29.17	14	48	29.1667
Science	31604265	Alexander I Young;Stefania Benonisdottir;Molly Przeworski;Augustine Kong	4;1;0;3	10.26;2.56;0.0;7.69	Alexander I Young	4	39	10.26	4	61	6.55738
PlosCompBiol	18535663	Pradipta Ray;Suyash Shringarpure;Mladen Kolar;Eric P Xing	0;0;0;1	0.0;0.0;0.0;3.33	Eric P Xing	1	30	3.33	2	44	4.54545
PlosPath	18688280	Kamna Aggarwal;Florentina Rus;Christie Vriesema-Magnuson;Deniz Ertürk-Hasdemir;Nicholas Paquette;Neal Silverman	2;0;0;0;0;8	4.17;0.0;0.0;0.0;0.0;16.67	Neal Silverman	8	48	16.67	8	48	16.6667
PlosCompBiol	30943207	Prashant S Hosmani;Teresa Shippy;Sherry Miller;Joshua B Benoit;Monica Munoz-Torres;Mirella Flores-Gonzalez;Lukas A Mueller;Helen Wiersma-Koch;Tom D'Elia;Susan J Brown;Surya Saha	1;1;1;1;1;0;2;1;1;1;2	4.0;4.0;4.0;4.0;4.0;0.0;8.0;4.0;4.0;4.0;8.0	Lukas A Mueller;Surya Saha	2	25	8	3	33	9.09091
Genetics	16415370	Létizia Camus-Kulandaivelu;Jean-Baptiste Veyrieras;Delphine Madur;Valérie Combes;Marie Fourmann;Stéphanie Barraud;Pierre Dubreuil;Brigitte Gouesnard;Domenica Manicacci;Alain Charcosset	0;0;0;0;0;0;1;2;0;3	0.0;0.0;0.0;0.0;0.0;0.0;3.85;7.69;0.0;11.54	Alain Charcosset	3	26	11.54	5	45	11.1111
PlosGenet	27560976	Da-Gang Hu;Cui-Hui Sun;Quan-Yan Zhang;Jian-Ping An;Chun-Xiang You;Yu-Jin Hao	2;2;0;0;3;4	3.64;3.64;0.0;0.0;5.45;7.27	Yu-Jin Hao	4	55	7.27	5	64	7.8125
PlosCompBiol	34499658	Andrea Tangherloni;Marco S Nobile;Paolo Cazzaniga;Giulia Capitoli;Simone Spolaor;Leonardo Rundo;Giancarlo Mauri;Daniela Besozzi	2;4;4;0;0;0;3;4	6.9;13.79;13.79;0.0;0.0;0.0;10.34;13.79	Marco S Nobile;Paolo Cazzaniga;Daniela Besozzi	4	29	13.79	14	74	18.9189
Nature	34616062	Trygve E Bakken;Nikolas L Jorstad;Qiwen Hu;Blue B Lake;Wei Tian;Brian E Kalmbach;Megan Crow;Rebecca D Hodge;Fenna M Krienen;Staci A Sorensen;Jeroen Eggermont;Zizhen Yao;Brian D Aevermann;Andrew I Aldridge;Anna Bartlett;Darren Bertagnolli;Tamara Casper;Rosa G Castanon;Kirsten Crichton;Tanya L Daigle;Rachel Dalley;Nick Dee;Nikolai Dembrow;Dinh Diep;Song-Lin Ding;Weixiu Dong;Rongxin Fang;Stephan Fis…	4;0;0;2;0;1;1;4;2;1;1;3;4;0;1;3;4;0;1;3;2;4;1;0;4;0;0;0;2;3;3;0;0;0;3;3;0;0;0;0;0;0;0;6;0;3;1;0;0;0;0;0;0;0;0;0;3;2;0;0;0;1;1;3;0;1;0;0;1;0;0;2;0;1;0;1;0;3;1;0;2;2;2;0;3;1;1;0;0;0;6;1;1;0;5;2;4;1;2;3;4;2;4;3;3;7	5.48;0.0;0.0;2.74;0.0;1.37;1.37;5.48;2.74;1.37;1.37;4.11;5.48;0.0;1.37;4.11;5.48;0.0;1.37;4.11;2.74;5.48;1.37;0.0;5.48;0.0;0.0;0.0;2.74;4.11;4.11;0.0;0.0;0.0;4.11;4.11;0.0;0.0;0.0;0.0;0.0;0.0;0.0;8.22;0.0;4.11;1.37;0.0;0.0;0.0;0.0;0.0;0.0;0.0;0.0;0.0;4.11;2.74;0.0;0.0;0.0;1.37;1.37;4.11;0.0;1.37;0.0;0.0;1.37;0.0;0.0;2.74;0.0;1.37;0.0;1.37;0.0;4.11;1.37;0.0;2.74;2.74;2.74;0.0;4.11;1.37;1.37;0.0;0.…	Ed S Lein	7	73	9.59	14	97	14.433
